# Supplementary material for: A Profile Hidden Markov Model to investigate the distribution and frequency of LanB-encoding lantibiotic modification genes in the human oral and gut microbiome
Source: PeerJ. 2017 Apr 27;5:e3254. doi: 10.7717/peerj.3254 (PMC5410138; doi:10.7717/peerj.3254)
Supplement: Table S1 [file peerj-05-3254-s001.xlsx]

## Sheet: lantibioticdehydratase_headers
RefSeq Protein ID
WP_046089405.1
WP_046004108.1
WP_045989718.1
WP_045936697.1
WP_045876518.1
WP_045862235.1
WP_045788553.1
WP_045185097.1
WP_045182794.1
WP_045182792.1
WP_045180900.1
WP_045143527.1
WP_044689687.1
WP_044688097.1
WP_044666392.1
WP_044474081.1
WP_044472820.1
WP_044375374.1
WP_044131333.1
WP_043973606.1
WP_043969516.1
WP_043969515.1
WP_043950512.1
WP_043914876.1
WP_043848171.1
WP_043839746.1
WP_043681076.1
WP_039650313.1
WP_018833122.1
WP_018831376.1
WP_043632771.1
WP_043591783.1
WP_043591019.1
WP_043563880.1
WP_043538072.1
WP_043471949.1
WP_043462511.1
WP_043455620.1
WP_043325491.1
WP_043324770.1
WP_043324641.1
WP_043324640.1
WP_043251537.1
WP_043222360.1
WP_043195898.1
WP_043185342.1
WP_043163272.1
WP_043160884.1
WP_043159544.1
WP_043134117.1
WP_042946644.1
WP_042802465.1
WP_042498679.1
WP_042450227.1
WP_042450223.1
WP_042448694.1
WP_042429246.1
WP_042420901.1
WP_042379394.1
WP_042379385.1
WP_042377835.1
WP_042370926.1
WP_042368995.1
WP_042366959.1
WP_042365809.1
WP_042365801.1
WP_042284372.1
WP_042176764.1
WP_042168411.1
WP_042168403.1
WP_042142741.1
WP_041939876.1
WP_041826595.1
WP_041825098.1
WP_041617499.1
WP_038522699.1
WP_041481327.1
WP_041255592.1
WP_003992137.1
WP_040997471.1
WP_040887429.1
WP_040878860.1
WP_040835983.1
WP_040697808.1
WP_019710799.1
WP_040322142.1
WP_040256321.1
WP_040246701.1
WP_040102765.1
WP_040081918.1
WP_039987294.1
WP_039947724.1
WP_039831745.1
WP_039821486.1
WP_039697799.1
WP_039611166.1
WP_039493188.1
WP_039364789.1
WP_039364786.1
WP_038846186.1
WP_038846182.1
WP_038842724.1
WP_038841756.1
WP_038841354.1
WP_038841350.1
WP_038840434.1
WP_038840430.1
WP_038840427.1
WP_038840425.1
WP_037695375.1
WP_038622228.1
WP_038619130.1
WP_030639251.1
WP_037949106.1
WP_037947268.1
WP_037942921.1
WP_037937031.1
WP_037936308.1
WP_037928569.1
WP_037928559.1
WP_037918309.1
WP_037880289.1
WP_037874102.1
WP_037854957.1
WP_037848287.1
WP_037845418.1
WP_037831827.1
WP_037830955.1
WP_037829321.1
WP_037821457.1
WP_037821456.1
WP_037815972.1
WP_037815967.1
WP_037815704.1
WP_037802075.1
WP_037796979.1
WP_037785640.1
WP_037784923.1
WP_037774391.1
WP_037764252.1
WP_037757241.1
WP_037756467.1
WP_037750527.1
WP_037747038.1
WP_037743910.1
WP_037741723.1
WP_037734939.1
WP_037734937.1
WP_037706005.1
WP_037700341.1
WP_037682612.1
WP_037681092.1
WP_037668553.1
WP_037664462.1
WP_037662068.1
WP_037654262.1
WP_037637681.1
WP_037633378.1
WP_037342714.1
WP_037332316.1
WP_011437698.1
WP_003327069.1
WP_036378125.1
WP_036378123.1
WP_036378122.1
WP_036326663.1
WP_035957293.1
WP_035913204.1
WP_035912685.1
WP_035910094.1
WP_035871538.1
WP_035863812.1
WP_035750401.1
WP_035732314.1
WP_035304520.1
WP_034736939.1
WP_034730028.1
WP_034730025.1
WP_034712612.1
WP_034687582.1
WP_034687581.1
WP_034495373.1
WP_034276544.1
WP_034268375.1
WP_034118156.1
WP_034089686.1
WP_034088887.1
YP_003766969.1
WP_033947193.1
WP_033670877.1
WP_033531148.1
WP_030883053.1
WP_033439099.1
WP_033401782.1
WP_033322169.1
WP_033313727.1
WP_033308378.1
WP_033305948.1
WP_033301536.1
WP_033274296.1
WP_033254842.1
WP_033250057.1
WP_033240194.1
WP_033224103.1
WP_033038385.1
WP_032760580.1
WP_032750741.1
WP_032748864.1
WP_032747222.1
WP_032799031.1
WP_032793937.1
WP_032793043.1
WP_032785970.1
WP_032780533.1
WP_032778946.1
WP_032775768.1
WP_032773118.1
WP_032770969.1
WP_032764114.1
WP_032764112.1
WP_032757256.1
WP_032756726.1
WP_032755710.1
WP_032753487.1
WP_032717387.1
WP_032717385.1
WP_032712354.1
WP_032710352.1
WP_014636302.1
WP_031520577.1
WP_031221181.1
WP_031178279.1
WP_031173724.1
WP_031173040.1
WP_031152036.1
WP_031151279.1
WP_031097960.1
WP_031096802.1
WP_030644600.1
WP_030642792.1
WP_030631086.1
WP_031103942.1
WP_031099956.1
WP_031097945.1
WP_031088843.1
WP_031088544.1
WP_031085985.1
WP_031045774.1
WP_031032267.1
WP_031027298.1
WP_031018991.1
WP_031014867.1
WP_031012110.1
WP_030997906.1
WP_030991583.1
WP_030982818.1
WP_030959259.1
WP_030936064.1
WP_030917298.1
WP_030913839.1
WP_030898821.1
WP_030894153.1
WP_030891301.1
WP_030883008.1
WP_030881392.1
WP_030864041.1
WP_030863287.1
WP_030863275.1
WP_030862248.1
WP_030862010.1
WP_030827442.1
WP_030803227.1
WP_030777608.1
WP_030773242.1
WP_030757910.1
WP_030751159.1
WP_030751150.1
WP_030750828.1
WP_030747653.1
WP_030738187.1
WP_030733728.1
WP_030705480.1
WP_030699446.1
WP_030633114.1
WP_030630843.1
WP_030589128.1
WP_030584999.1
WP_030578085.1
WP_030575382.1
WP_030568644.1
WP_030546612.1
WP_030546351.1
WP_030542442.1
WP_030502737.1
WP_030502632.1
WP_030502631.1
WP_030501984.1
WP_030501981.1
WP_030487022.1
WP_030480360.1
WP_030462490.1
WP_030445690.1
WP_030422673.1
WP_030422119.1
WP_030421822.1
WP_030419820.1
WP_030408388.1
WP_030349117.1
WP_030343649.1
WP_030336766.1
WP_030331067.1
WP_030310048.1
WP_030294152.1
WP_030269088.1
WP_030269086.1
WP_030268917.1
WP_030268910.1
WP_030169929.1
WP_030154609.1
WP_030154602.1
WP_030153937.1
WP_030115472.1
WP_030115471.1
WP_030086230.1
WP_030049680.1
WP_030034451.1
WP_030023381.1
WP_030021736.1
WP_030021725.1
WP_030017922.1
WP_029974853.1
WP_029728792.1
WP_029728241.1
WP_029690401.1
WP_029553717.1
WP_029539268.1
WP_029539266.1
WP_029539263.1
WP_029537939.1
WP_029295917.1
WP_029188915.1
WP_029180361.1
WP_029130681.1
WP_029130251.1
WP_029128694.1
WP_029128693.1
WP_029128692.1
WP_029126924.1
WP_029126921.1
WP_029126390.1
WP_029126388.1
WP_029126387.1
WP_029126386.1
WP_029126021.1
WP_029125139.1
WP_029125138.1
WP_029125136.1
WP_029125133.1
WP_029122801.1
WP_029122245.1
WP_029122243.1
WP_029028737.1
WP_029028069.1
WP_029026772.1
WP_029026771.1
WP_029026769.1
WP_029026764.1
WP_029025895.1
WP_029025892.1
WP_029025175.1
WP_029025174.1
WP_029024902.1
WP_029024804.1
WP_029024278.1
WP_029023792.1
WP_029023789.1
WP_029023788.1
WP_029023445.1
WP_029023443.1
WP_029021338.1
WP_029021237.1
WP_029021231.1
WP_029021229.1
WP_029021228.1
WP_029019434.1
WP_029019430.1
WP_028964810.1
WP_028958915.1
WP_018833081.1
WP_018833080.1
WP_018833076.1
WP_018831088.1
WP_028680258.1
WP_028679820.1
WP_028679756.1
WP_028679755.1
WP_028679754.1
WP_028679342.1
WP_028679143.1
WP_028679081.1
WP_028679080.1
WP_028679078.1
WP_028677457.1
WP_028677456.1
WP_028677454.1
WP_028677393.1
WP_028676680.1
WP_028676581.1
WP_028676578.1
WP_028676577.1
WP_028676576.1
WP_028676382.1
WP_028676379.1
WP_028676080.1
WP_028675896.1
WP_028675494.1
WP_028675024.1
WP_028674821.1
WP_028674818.1
WP_028674816.1
WP_028674772.1
WP_028674034.1
WP_028674033.1
WP_028673425.1
WP_028673423.1
WP_028570234.1
WP_028570232.1
WP_028569517.1
WP_028569515.1
WP_028568148.1
WP_028568147.1
WP_028568145.1
WP_028568143.1
WP_028565852.1
WP_028565848.1
WP_028564338.1
WP_028443301.1
WP_028440955.1
WP_028435936.1
WP_028431651.1
WP_028426921.1
WP_028418006.1
WP_028417600.1
WP_028193803.1
WP_028193802.1
WP_028193800.1
WP_028193799.1
WP_028193090.1
WP_028192049.1
WP_028192048.1
WP_028192045.1
WP_028190855.1
WP_028190073.1
WP_028190070.1
WP_028189382.1
WP_028189381.1
WP_028189380.1
WP_028189379.1
WP_028189135.1
WP_028188375.1
WP_028186823.1
WP_028186448.1
WP_028186446.1
WP_028186002.1
WP_028186001.1
WP_028185999.1
WP_028185897.1
WP_028185896.1
WP_028185004.1
WP_028184230.1
WP_028184228.1
WP_028183792.1
WP_028183210.1
WP_028182858.1
WP_028182854.1
WP_028182742.1
WP_027773203.1
WP_027768240.1
WP_027764247.1
WP_027754119.1
WP_027753893.1
WP_027748771.1
WP_027743651.1
WP_027732762.1
WP_027661188.1
WP_027660060.1
WP_027660059.1
WP_027660057.1
WP_027660055.1
WP_027658471.1
WP_027658130.1
WP_027658128.1
WP_027657004.1
WP_027657003.1
WP_027657001.1
WP_027656996.1
WP_027656665.1
WP_027654918.1
WP_027654916.1
WP_027652240.1
WP_027651785.1
WP_027651552.1
WP_027651551.1
WP_027651549.1
WP_027651543.1
WP_027649747.1
WP_027648540.1
WP_027648166.1
WP_027646202.1
WP_027645983.1
WP_027645981.1
WP_027644799.1
WP_027644556.1
WP_027380189.1
WP_027380188.1
WP_027373545.1
WP_027373544.1
WP_027346389.1
WP_026426212.1
WP_026341091.1
WP_026325327.1
WP_026324348.1
WP_026322779.1
WP_026322577.1
WP_026321356.1
WP_026311608.1
WP_026274251.1
WP_026273792.1
WP_026273719.1
WP_026273459.1
WP_026271109.1
WP_026270668.1
WP_026270666.1
WP_026269980.1
WP_026269074.1
WP_026268635.1
WP_026268237.1
WP_026241674.1
WP_026237748.1
WP_026237414.1
WP_026185152.1
WP_026184539.1
WP_026085105.1
WP_026004409.1
WP_025618785.1
WP_025618784.1
WP_025618782.1
WP_025618776.1
WP_025618759.1
WP_025616865.1
WP_025365951.1
WP_024937221.1
WP_024888415.1
WP_024888411.1
WP_024888386.1
WP_024887824.1
WP_024696743.1
WP_024681299.1
WP_024659319.1
WP_024564988.1
WP_024494127.1
WP_024343842.1
WP_018825373.1
WP_018824923.1
WP_018824241.1
WP_018824240.1
WP_018806007.1
WP_018585332.1
WP_018584313.1
WP_018583061.1
WP_018583060.1
WP_018583058.1
WP_018583052.1
WP_014152235.1
WP_014152232.1
WP_011436464.1
WP_023636134.1
WP_023522750.1
WP_023416955.1
WP_002986058.1
WP_002985198.1
WP_002526082.1
WP_011026974.1
WP_020700029.1
WP_020609516.1
WP_020609284.1
WP_020218083.1
WP_020216928.1
WP_020216927.1
WP_020216925.1
WP_020216920.1
WP_020215513.1
WP_020215510.1
WP_019982950.1
WP_019901713.1
WP_019900826.1
WP_019872300.1
WP_019870463.1
WP_019870459.1
WP_019868771.1
WP_019868763.1
WP_019868762.1
WP_019532354.1
WP_019532352.1
WP_019532215.1
WP_019531735.1
WP_019531733.1
WP_019331809.1
WP_019033467.1
WP_019033415.1
WP_019032910.1
WP_019032908.1
WP_019031925.1
WP_019031607.1
WP_019031462.1
WP_019031461.1
WP_019031459.1
WP_019031458.1
WP_019030953.1
WP_019030571.1
WP_018960400.1
WP_018909163.1
WP_018908451.1
WP_018908450.1
WP_018908445.1
WP_018908087.1
WP_018907905.1
WP_018907902.1
WP_018831093.1
WP_018831086.1
WP_018831085.1
WP_018828295.1
WP_018827408.1
WP_018827407.1
WP_018827402.1
WP_018823145.1
WP_018822921.1
WP_018822920.1
WP_018822912.1
WP_018819251.1
WP_018814125.1
WP_018814124.1
WP_018814122.1
WP_018814120.1
WP_018812280.1
WP_018811182.1
WP_018811181.1
WP_018809074.1
WP_018808750.1
WP_018808747.1
WP_018808745.1
WP_018808101.1
WP_018808098.1
WP_018806959.1
WP_018806456.1
WP_018806453.1
WP_018806002.1
WP_018805340.1
WP_018804658.1
WP_018804656.1
WP_018803728.1
WP_018803248.1
WP_018803245.1
WP_018802918.1
WP_018802914.1
WP_018802913.1
WP_018802307.1
WP_018801343.1
WP_018801342.1
WP_018801340.1
WP_018801339.1
WP_018800092.1
WP_018800088.1
WP_018798836.1
WP_018798833.1
WP_018798831.1
WP_018798830.1
WP_018798328.1
WP_018798325.1
WP_018797539.1
WP_018796376.1
WP_018796373.1
WP_018795261.1
WP_018795257.1
WP_018795255.1
WP_018795254.1
WP_018794745.1
WP_018793768.1
WP_018792306.1
WP_018792300.1
WP_018792298.1
WP_018792297.1
WP_018792069.1
WP_018792065.1
WP_018791345.1
WP_018790322.1
WP_018789312.1
WP_018789308.1
WP_018789306.1
WP_018744294.1
WP_018744293.1
WP_018744285.1
WP_018742402.1
WP_018739975.1
WP_018739739.1
WP_018738130.1
WP_018736294.1
WP_018736291.1
WP_018734269.1
WP_018733757.1
WP_018730407.1
WP_018730272.1
WP_018730268.1
WP_018727370.1
WP_018727369.1
WP_018727361.1
WP_018726428.1
WP_018724828.1
WP_018722923.1
WP_018722922.1
WP_018722920.1
WP_018722914.1
WP_018588028.1
WP_018586886.1
WP_018586883.1
WP_018586673.1
WP_018586670.1
WP_018586669.1
WP_018586668.1
WP_018543779.1
WP_018490582.1
WP_018223417.1
WP_018223416.1
WP_018223414.1
WP_018223408.1
WP_018216225.1
WP_018216217.1
WP_018216216.1
WP_018215614.1
WP_017218565.1
WP_017194254.1
WP_016827440.1
WP_016816843.1
WP_016814867.1
WP_010599749.1
WP_006322107.1
WP_014836701.1
WP_014691099.1
WP_014691096.1
WP_014690721.1
WP_014676475.1
WP_014665265.1
WP_014526137.1
WP_014522248.1
WP_014401332.1
WP_014367479.1
WP_014319335.1
WP_014318174.1
WP_014317081.1
WP_014310813.1
WP_014307310.1
WP_014303855.1
WP_014179519.1
WP_014141308.1
WP_014056280.1
WP_014054576.1
WP_013912127.1
WP_013477164.1
WP_013287251.1
WP_013285809.1
WP_013242481.1
WP_013018833.1
WP_010606992.1
WP_010384900.1
WP_010377621.1
WP_010073639.1
WP_009950719.1
WP_009748355.1
WP_009746930.1
WP_008746441.1
WP_008733930.1
WP_007729072.1
WP_006605023.1
WP_006541250.1
WP_006347620.1
WP_006345936.1
WP_004991564.1
WP_004936802.1
WP_004921201.1
WP_004667877.1
WP_004663986.1
WP_003978596.1
WP_003784907.1
WP_003345793.1
WP_002962914.1
WP_002943316.1
WP_002522751.1
WP_001803290.1
WP_000400478.1
WP_015802361.1
WP_015802358.1
WP_013020620.1
WP_010074272.1
WP_012183377.1
WP_012183371.1
WP_012183369.1
WP_012183368.1
WP_012182730.1
WP_012180840.1
WP_012180563.1
WP_012180560.1
WP_012014269.1
WP_012014263.1
WP_012014261.1
WP_012014260.1
WP_004155757.1
WP_003960873.1
WP_003955818.1
WP_002705587.1
WP_002698086.1
WP_002694132.1
WP_013851900.1
WP_013667703.1
WP_013664388.1
WP_013664002.1
WP_013226633.1
WP_013000960.1
WP_012792927.1
WP_012789109.1
WP_012380186.1
WP_003230098.1
WP_002543685.1
WP_002542875.1
WP_002535358.1
WP_002510689.1
