# Supplementary material for: A Profile Hidden Markov Model to investigate the distribution and frequency of LanB-encoding lantibiotic modification genes in the human oral and gut microbiome
Source: PeerJ. 2017 Apr 27;5:e3254. doi: 10.7717/peerj.3254 (PMC5410138; doi:10.7717/peerj.3254)
Supplement: Table S4 [file peerj-05-3254-s004.xlsx]

## Sheet: Sheet1
Body Site	Sample	Contig	Also Identified by Pfam	Also Identified by BlastP
Oral	SRS011098	contig-100_15454.15454	No	No
Oral	SRS013533	contig-100_13993.137974	No	No
Oral	SRS013949	contig-100_16.127362	No	No
Oral	SRS014476	contig-100_19698.19698	No	No
Oral	SRS014476	contig-100_33982.33982	No	No
Oral	SRS014578	contig-100_25195.25195	No	No
Oral	SRS014684	15756	No	No
Oral	SRS014691	contig-100_6081.124540	No	No
Oral	SRS015040	629	Yes	Yes
Oral	SRS015060	9087	No	No
Oral	SRS015158	contig-100_15337.100130	No	No
Oral	SRS015215	24967	No	Yes
Oral	SRS015278	contig-100_10111.10111	No	No
Oral	SRS015470	2052	No	Yes
Oral	SRS016002	contig-100_476.158552	Yes	No
Oral	SRS017080	contig-100_5941.5941	No	No
Oral	SRS017439	contig-100_1672.143182.143182	Yes	Yes
Oral	SRS018591	contig-100_9765.9765	No	No
Oral	SRS019029	23866	No	No
Oral	SRS019219	C2945900	No	No
Oral	SRS019974	contig-100_20140.20140.20140	Yes	No
Oral	SRS021960	contig-100_10619.10619	No	No
Oral	SRS023358	contig-100_2141.2141	No	No
Oral	SRS023938	5276	No	No
Oral	SRS024081	SRS024081_LANL_scaffold_14492	Yes	Yes
Oral	SRS042131	3502	Yes	No
Oral	SRS045127	11735	No	No
Oral	SRS056622	17271	Yes	No
Oral	SRS058808	33685	No	No
Oral	SRS063999	contig-100_1693.183379	No	No
Stool	SRS011271	4525	Yes	Yes
Stool	SRS011271	contig-100_502.150577	Yes	Yes
Stool	SRS013476	35183	No	Yes
Stool	SRS014287	9924	Yes	Yes
Stool	SRS015133	C3441160	No	No
Stool	SRS015217	11881	Yes	Yes
Stool	SRS015578	contig-100_12750.137163	No	No
Stool	SRS015782	C3311357	No	No
Stool	SRS016954	19735	No	Yes
Stool	SRS017521	contig-100_1016.215526	Yes	Yes
Stool	SRS018656	contig-100_2624.65167	No	Yes
Stool	SRS018817	12490	Yes	No
Stool	SRS019267	contig-100_30866.30866	No	No
Stool	SRS019397	467	No	No
Stool	SRS019910	contig-100_13822.36985	No	Yes
Stool	SRS020233	53970	Yes	Yes
Stool	SRS022071	5852	No	Yes
Stool	SRS024625	contig-100_26018.53974	Yes	No
Stool	SRS043411	11272	No	No
Stool	SRS047014	contig-100_7652.187852	No	No
Stool	SRS048164	2584	Yes	Yes
Stool	SRS048870	contig-100_3433.99515	Yes	Yes
Stool	SRS049712	contig-100_19642.88407	No	No
Stool	SRS049995	22549	Yes	Yes
Stool	SRS050925	contig-100_30127.70203	No	No
Stool	SRS052697	contig-100_723.255260	Yes	Yes
Stool	SRS054590	contig-100_344.344	No	No
Stool	SRS062427	8699	Yes	Yes
Stool	SRS065504	22874	No	No
Stool	SRS065504	contig-100_509.193795	No	No
